# Supplementary material for: Reduced graphene oxide aerogel-supported Fe-ZIF-67/ZIF-8 enables scalable synthesis of high-performance bifunctional catalysts for zinc–air batteries
Source: Royal Society of Chemistry journal article supplement (doi:10.1039/d5cy01455g), 2026-01-01
Supplement: d5cy01455g1.pdf [file d5cy01455g1.pdf]

## Supporting Information

### **Reduced graphene oxide aerogel-supported Fe-ZIF-67/ZIF-8 enables scalable synthesis of high-performance bifunctional catalysts for zinc-air batteries**

Kaifa Liu<sup>a</sup>, Yingzi Huang<sup>a</sup>, Xin Wang<sup>a</sup>, Zhi Ling<sup>a</sup>, Di Chen<sup>b</sup>, Fengying Yan<sup>a</sup>, Beili Pang<sup>a</sup>, Qian  
Zhang<sup>a</sup>, Jianhua Yu<sup>a,\*</sup>, Liyan Yu<sup>a,\*</sup>, Lifeng Dong<sup>a,c,\*</sup>

<sup>a</sup> College of Materials Science and Engineering, Qingdao University of Science and Technology,  
Qingdao 266042, P. R. China

<sup>b</sup> Shandong Engineering Research Center of Green and High-value Marine Fine Chemical,  
Weifang University of Science and Technology, Shouguang 262700, P. R. China

<sup>c</sup> Department of Physics, Hamline University, St. Paul 55104, USA

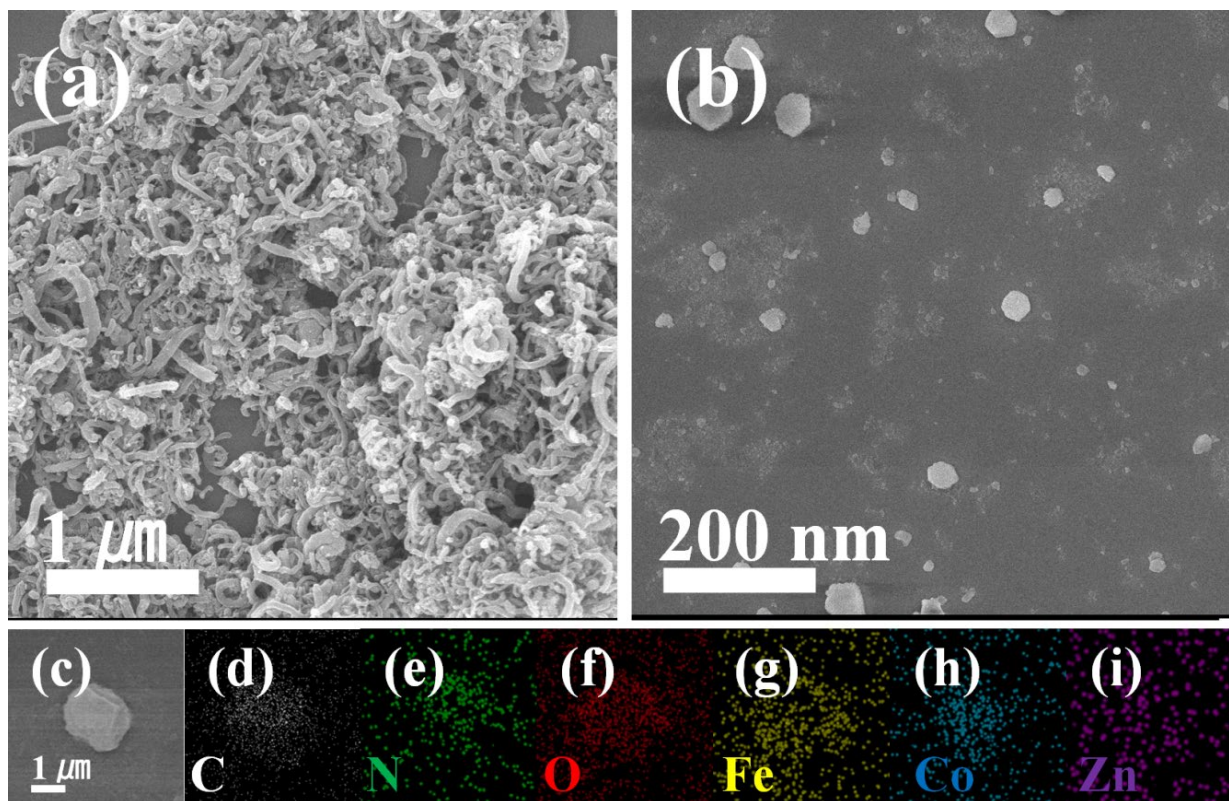

Fig. S1. (a) SEM image of Fe-ZIF-67/ZIF-8, (b) SEM image of FeCo-NC@rGO, and (c-i) EDS elemental maps of Fe-ZIF-67/ZIF-8.

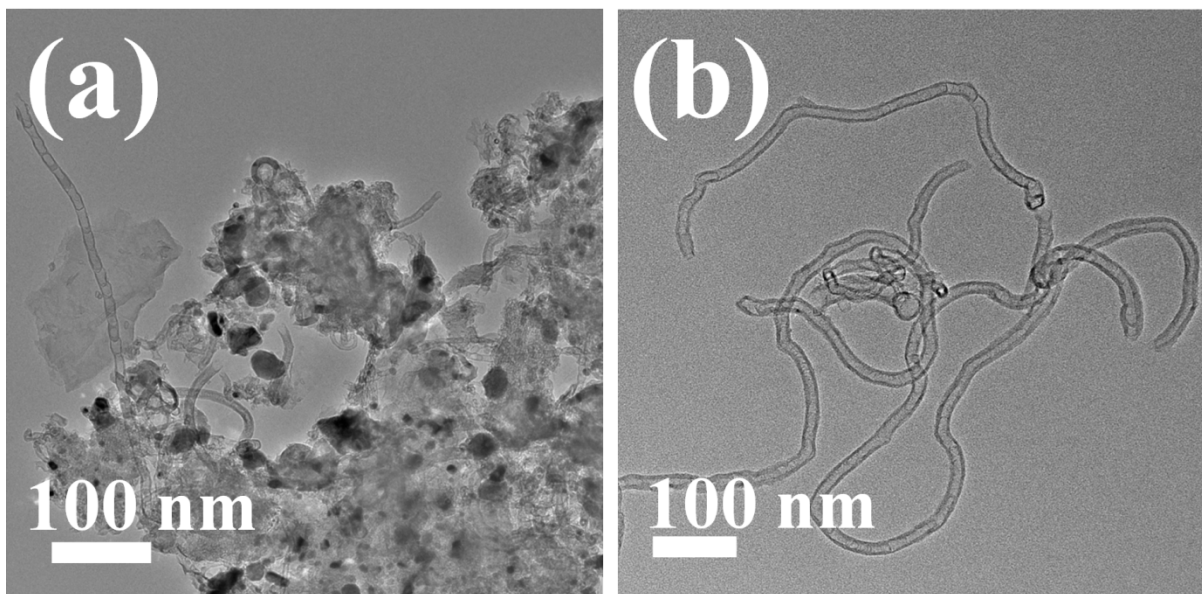

Fig. S2. TEM images of FeCo-NC@rGO.

**Table S1**  $R_s$  and  $R_{ct}$  values of FeCo-NC@rGO and FeCo-NC.

| Samples     | $R_s$ (ohm) | $R_{ct}$ (ohm) |
|-------------|-------------|----------------|
| FeCo-NC@rGO | 12.19       | 113.2          |
| FeCo-NC     | 24.92       | 143.2          |

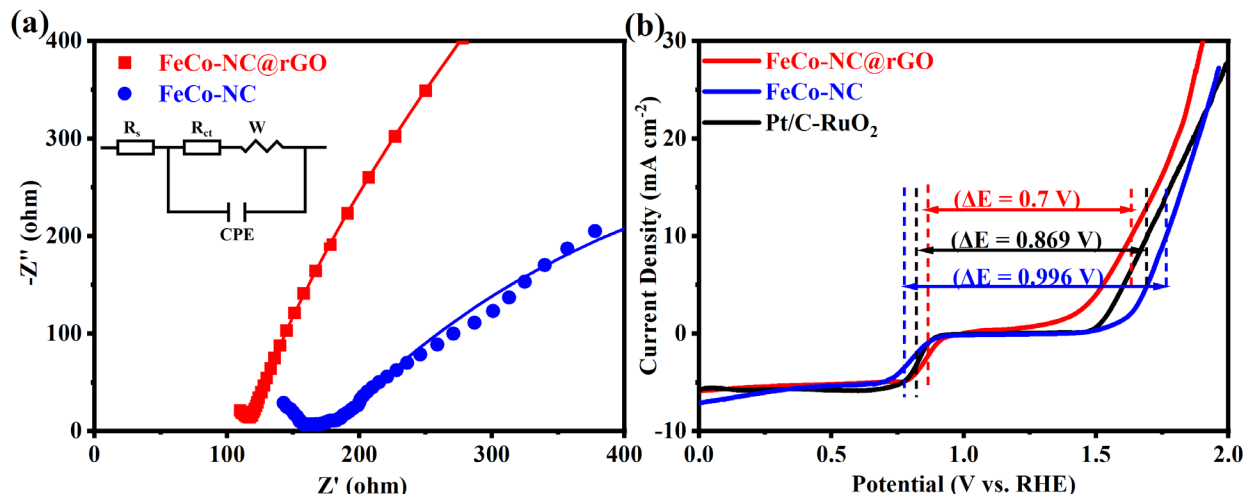

Fig. S3. (a) EIS spectra of FeCo-NC@rGO and FeCo-NC measured in O<sub>2</sub>-saturated 0.1 M KOH solution. (b) Overall polarization curves of FeCo-NC@rGO, FeCo-NC, Pt/C, and RuO<sub>2</sub> recorded in 0.1 M KOH. The overall bifunctional oxygen electrocatalytic performance is evaluated using

$$\Delta E = E_{j=10} - E_{1/2}, \text{ where } E_{1/2} \text{ is the ORR half-wave potential and } E_{j=10} \text{ is the OER potential at a current density of } 10 \text{ mA cm}^{-2}.$$

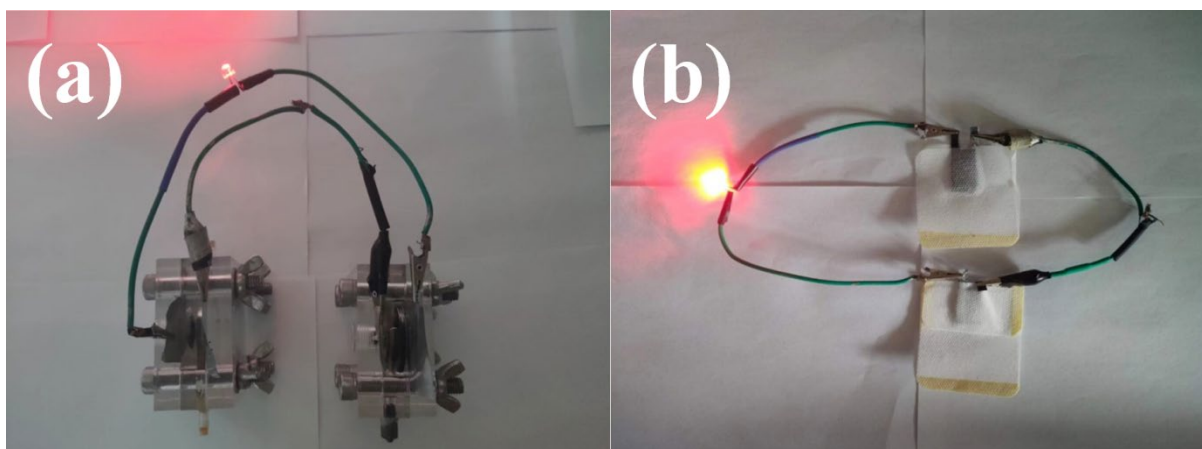

Fig. S4. Photographs showing a red LED powered by FeCo-NC@rGO based devices: (a) liquid Zn-air battery and (b) solid-state flexible battery.
